# Supplementary material for: Effectiveness of azvudine in reducing mortality of COVID-19 patients: a systematic review and meta-analysis
Source: Springer Nature journal article supplement (doi:10.1186/s12985-024-02316-y), 2024-02-23
Supplement: MOESM1 [file 26772570]

**Supplementary Table 1.** Search strategy and original results from database.

|     |                                                                 | Pubmed  | Embase  | Cochrane | Web of Science | L.OVE* |
|-----|-----------------------------------------------------------------|---------|---------|----------|----------------|--------|
| #1  | Azvodine                                                        | 42      | 79      | 22       | 65             | 45     |
| #2  | FNC                                                             | 545     | 699     | 52       | 909            | 8      |
| #3  | 2'-deoxy-2'-β -fluoro-4'azidocytidine                           | 45      | 2       | 0        | 0              | 0      |
| #4  | COVID-19[MeSH Terms]                                            | 237,193 | 420,415 | 16,585   | 413,378        |        |
| #5  | SARS-CoV-2[MeSH Terms]                                          | 158,358 | 155,355 | 6,449    | 242,537        |        |
| #6  | Coronavirus Disease 2019                                        | 367,890 | 347,358 | 7,317    | 153,092        |        |
| #7  | 2019 nCoV Disease                                               | 366,542 | 30      | 179      | 5198           |        |
| #8  | 2019 nCoV Infection                                             | 366,572 | 200     | 184      | 5024           |        |
| #9  | 2019 Novel Coronavirus Disease                                  | 366,545 | 484     | 688      | 17,559         |        |
| #10 | 2019 Novel Coronavirus Infection                                | 366,561 | 91      | 390      | 15,450         |        |
| #11 | SARS-CoV-2 Infection                                            | 367,959 | 34,477  | 3,804    | 171,635        |        |
| #12 | Severe Acute Respiratory Syndrome Coronavirus 2                 | 210,652 | 107,630 | 2,477    | 138,435        |        |
| #13 | SARS Coronavirus 2                                              | 208,574 | 7,655   | 4,249    | 175,645        |        |
| #14 | #1 OR #2 OR #3                                                  | 568     | 827     | 63       | 953            | 45     |
| #15 | #4 OR #5 OR #6 OR #7 OR #8 OR #9 OR #10 OR<br>#11 OR #12 OR #13 | 383,387 | 451,333 | 17,933   | 455,690        |        |
| #16 | #14 AND #15                                                     | 27      | 64      | 18       | 30             | 45     |

\* L.OVE: Epistemonikos COVID-19 Living Overview of Evidence database

**Supplementary Table 2.** Risk of bias of included cohort studies.

| Author        | Year | Bias due to confounding | Bias in selection of participants into study | Bias in classification of interventions | Bias due to deviations from intended intervention | Bias due to missing data | Bias in measurement of outcomes | Bias in selection of the reported result | Overall  |
|---------------|------|-------------------------|----------------------------------------------|-----------------------------------------|---------------------------------------------------|--------------------------|---------------------------------|------------------------------------------|----------|
| Wenmei Chen   | 2023 | Moderate                | Low                                          | Low                                     | Low                                               | Low                      | Low                             | Moderate                                 | Moderate |
| Yating Dian   | 2023 | Moderate                | Low                                          | Low                                     | Low                                               | Low                      | Low                             | Moderate                                 | Moderate |
| Yuan Gao      | 2023 | Moderate                | Low                                          | Low                                     | Low                                               | Low                      | Low                             | Moderate                                 | Moderate |
| Jiasheng Shao | 2023 | Serious                 | Low                                          | Low                                     | Low                                               | Low                      | Low                             | Moderate                                 | Serious  |
| Yuming Sun    | 2023 | Moderate                | Low                                          | Low                                     | Low                                               | Low                      | Low                             | Moderate                                 | Moderate |
| Hui Yang      | 2023 | Moderate                | Low                                          | Low                                     | Low                                               | Low                      | Low                             | Moderate                                 | Moderate |
| Kaican Zong   | 2023 | Moderate                | Low                                          | Low                                     | Low                                               | Low                      | Low                             | Moderate                                 | Moderate |
| Minxue Shen   | 2023 | Moderate                | Low                                          | Low                                     | Low                                               | Low                      | Low                             | Moderate                                 | Moderate |
| Xinjie Han    | 2023 | Moderate                | Low                                          | Low                                     | Low                                               | Low                      | Low                             | Moderate                                 | Moderate |
| Ru Chen       | 2023 | Moderate                | Low                                          | Low                                     | Low                                               | Low                      | Low                             | Moderate                                 | Moderate |
| Yiling Zhou   | 2023 | Unclear                 | Low                                          | Low                                     | Low                                               | Low                      | Low                             | Moderate                                 | Unclear  |
| Shunlai Shang | 2023 | Moderate                | Low                                          | Low                                     | Low                                               | Low                      | Low                             | Moderate                                 | Moderate |
| Qinqin Zhao   | 2023 | Moderate                | Low                                          | Low                                     | Low                                               | Low                      | Low                             | Moderate                                 | Moderate |

|                   |      |          |     |     |     |     |     |          |          |
|-------------------|------|----------|-----|-----|-----|-----|-----|----------|----------|
| Guangtong<br>Deng | 2023 | Moderate | Low | Low | Low | Low | Low | Moderate | Moderate |
|-------------------|------|----------|-----|-----|-----|-----|-----|----------|----------|

**Supplementary Table 3.** Risk of bias of included randomized controlled studies.

| Autor                   | Year | Random<br>sequence<br>generation | Allocation<br>concealment | Blinding of<br>participants<br>and<br>personnel | Blinding<br>of<br>outcome<br>assessment | Incomplete<br>outcome<br>data | Selecting<br>reporting | Other<br>bias |
|-------------------------|------|----------------------------------|---------------------------|-------------------------------------------------|-----------------------------------------|-------------------------------|------------------------|---------------|
| Zhigang Ren             | 2020 | Low                              | Unclear                   | High                                            | Low                                     | Low                           | Low                    | Low           |
| Renato Martins da Silva | 2023 | Low                              | Low                       | Unclear                                         | Unclear                                 | Low                           | Low                    | Low           |
| Paula Cabral            | 2022 | Low                              | Low                       | Unclear                                         | Unclear                                 | Low                           | Low                    | Low           |

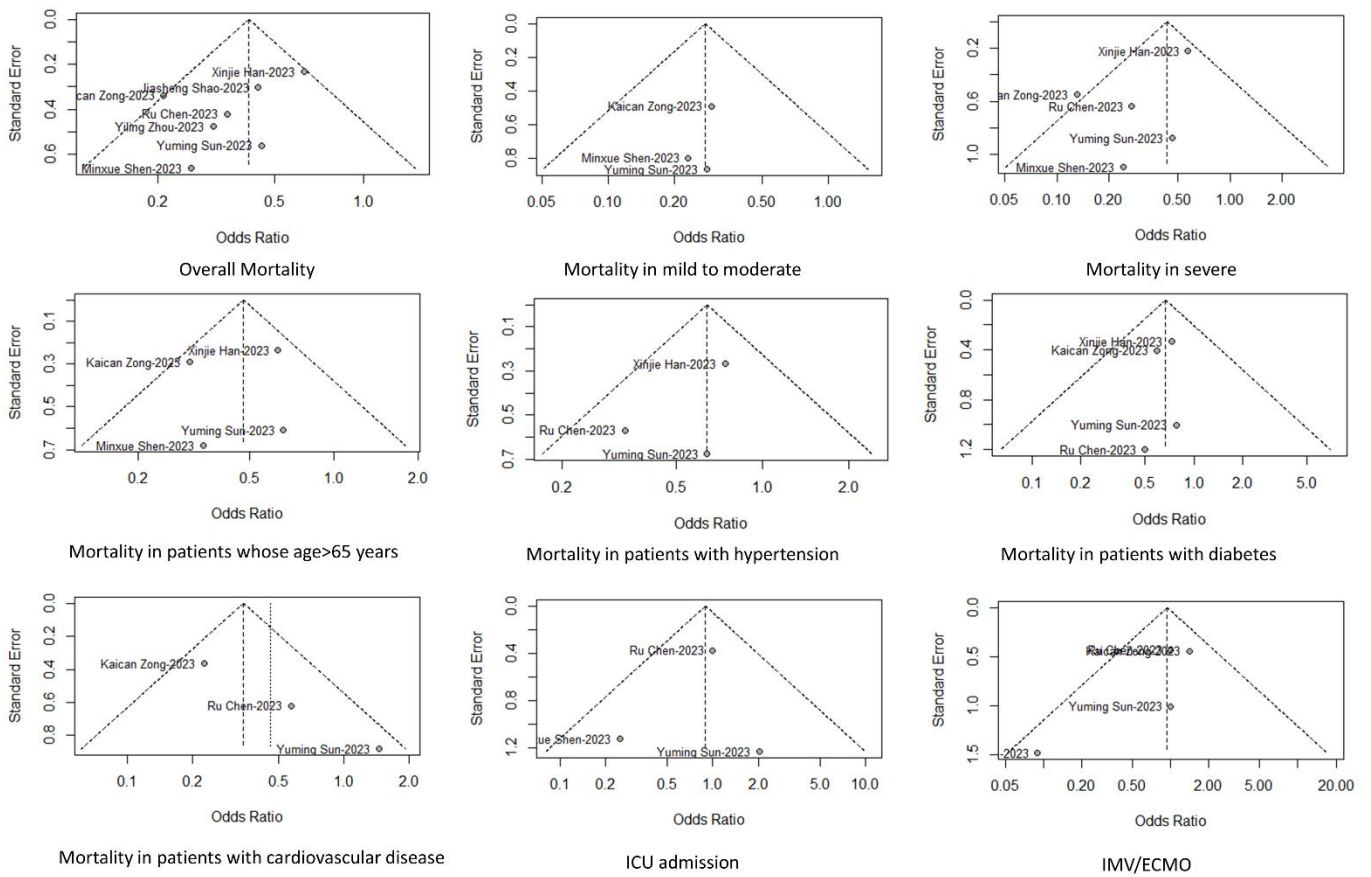

**Supplementary Fig. 1.** Publication bias evaluated by funnel plots for efficacy of azvudine.

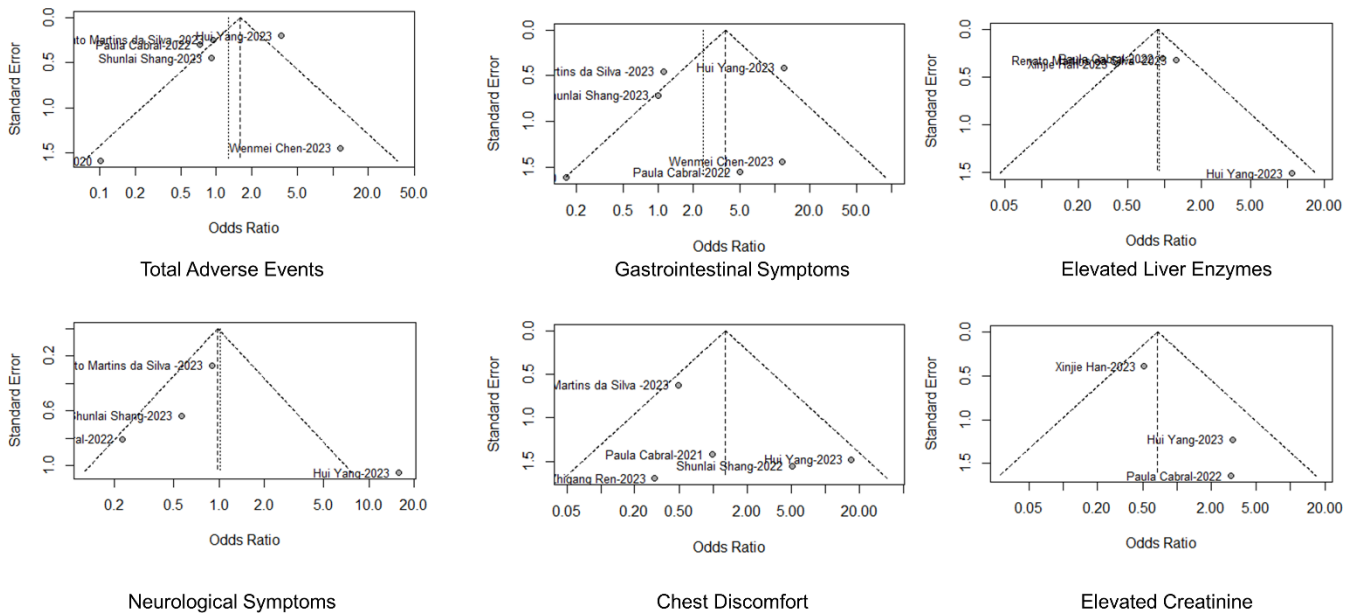

**Supplementary Fig. 2.** Publication bias evaluated by funnel plots for adverse events of azvudine.

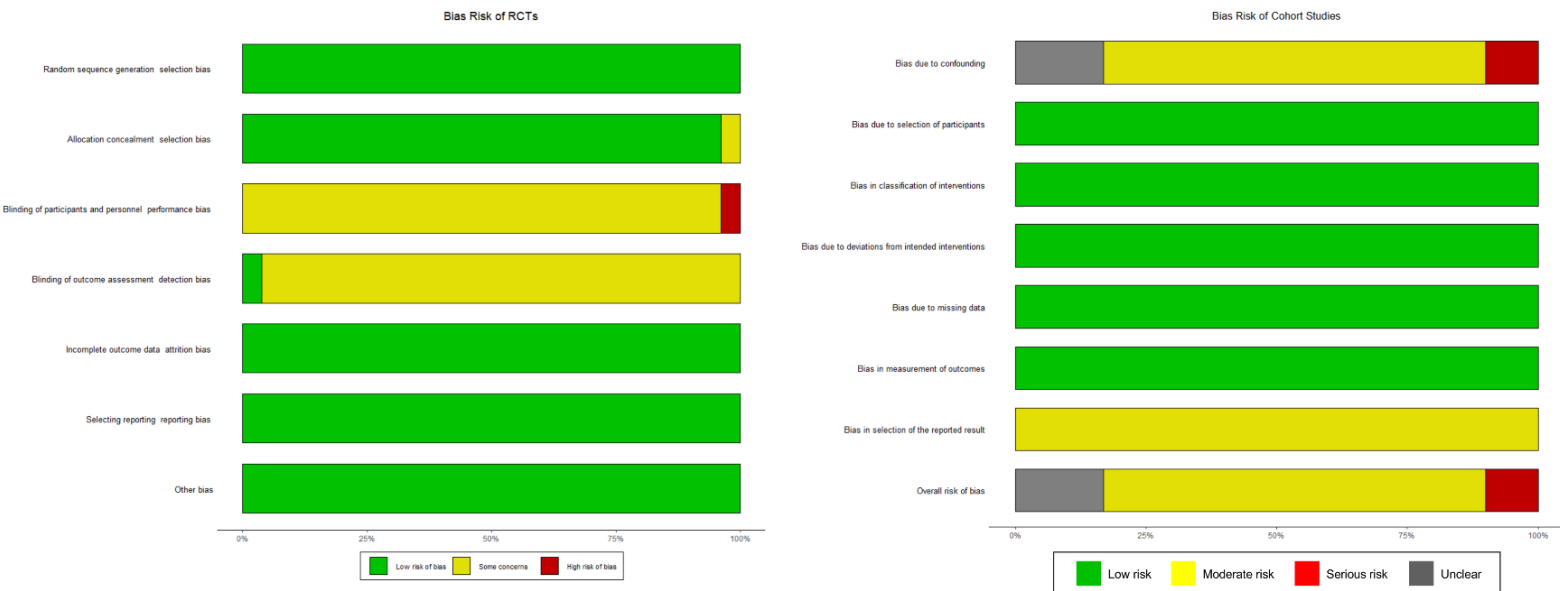

Supplementary Fig. 3. Risk of bias of included studies.

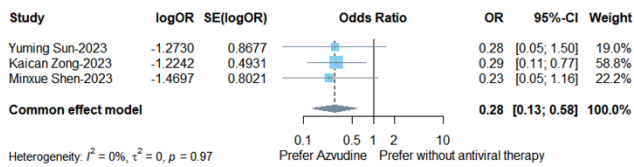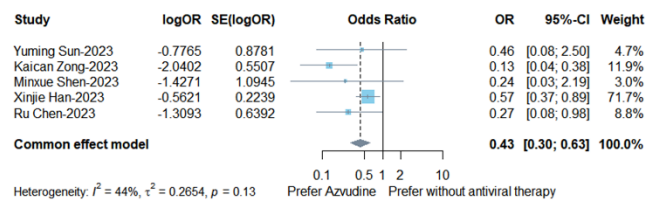

Mortality in mild to moderate

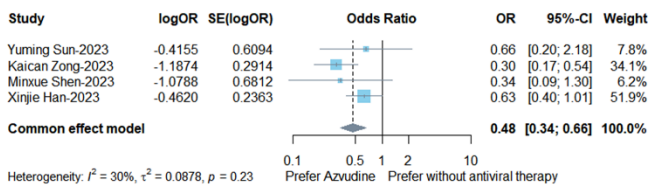

Mortality in severe

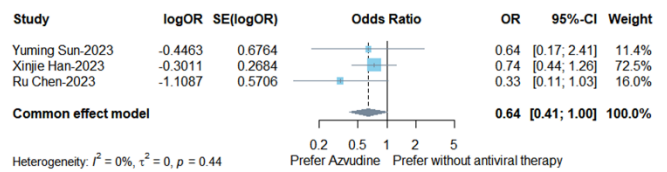

Mortality in patients whose age>65 years

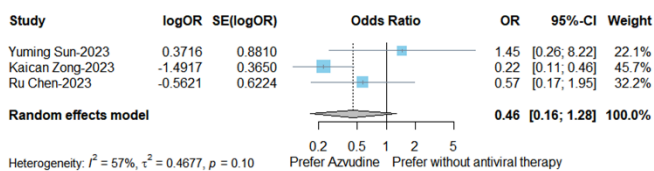

Mortality in patients with hypertension

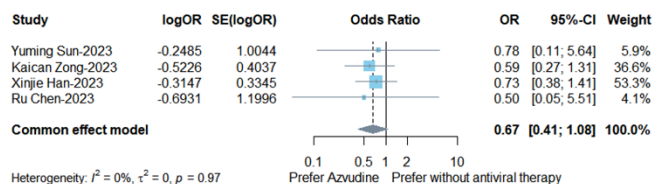

Mortality in patients with cardiovascular disease

Mortality in patients with diabetes

Supplementary Fig. 4. Effectiveness of azvudine on mortality in COVID-19 patients.

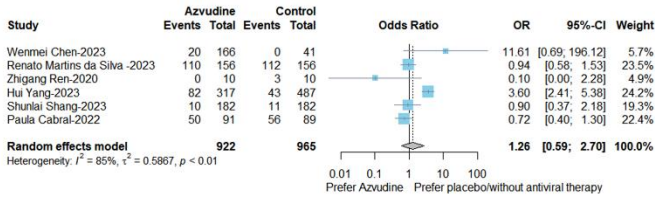

Total Adverse Events

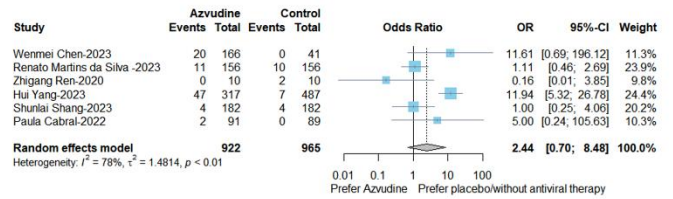

Digestive Symptoms

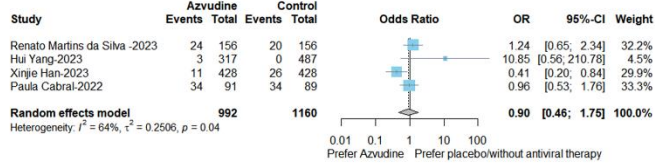

Elevated Liver Enzymes

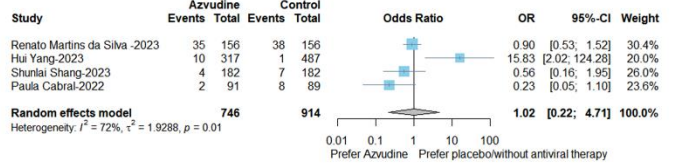

Neurological Symptoms

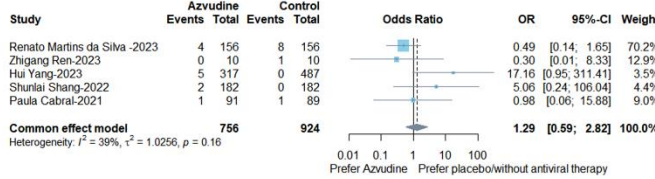

Chest Discomfort

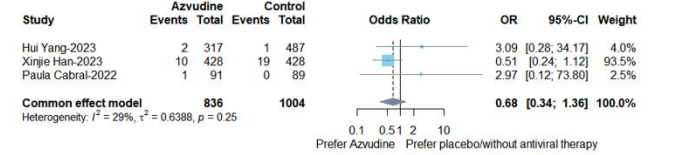

Elevated Creatinine

Supplementary Fig. 5. Adverse events of azvudine compared with controls.
